# Supplementary material for: Strong Discrepancies between Local Temperature Mapping and Interpolated Climatic Grids in Tropical Mountainous Agricultural Landscapes
Source: PLOS journal article supplement (doi:10.1371/journal.pone.0105541), 2014-08-20
Supplement: S1 (10.1371/journal.pone.0105541.s001) [file journal.pone.0105541.s001]

604 **Appendix S1:** Habitat and field size distribution in the three studied altitudinal belts.

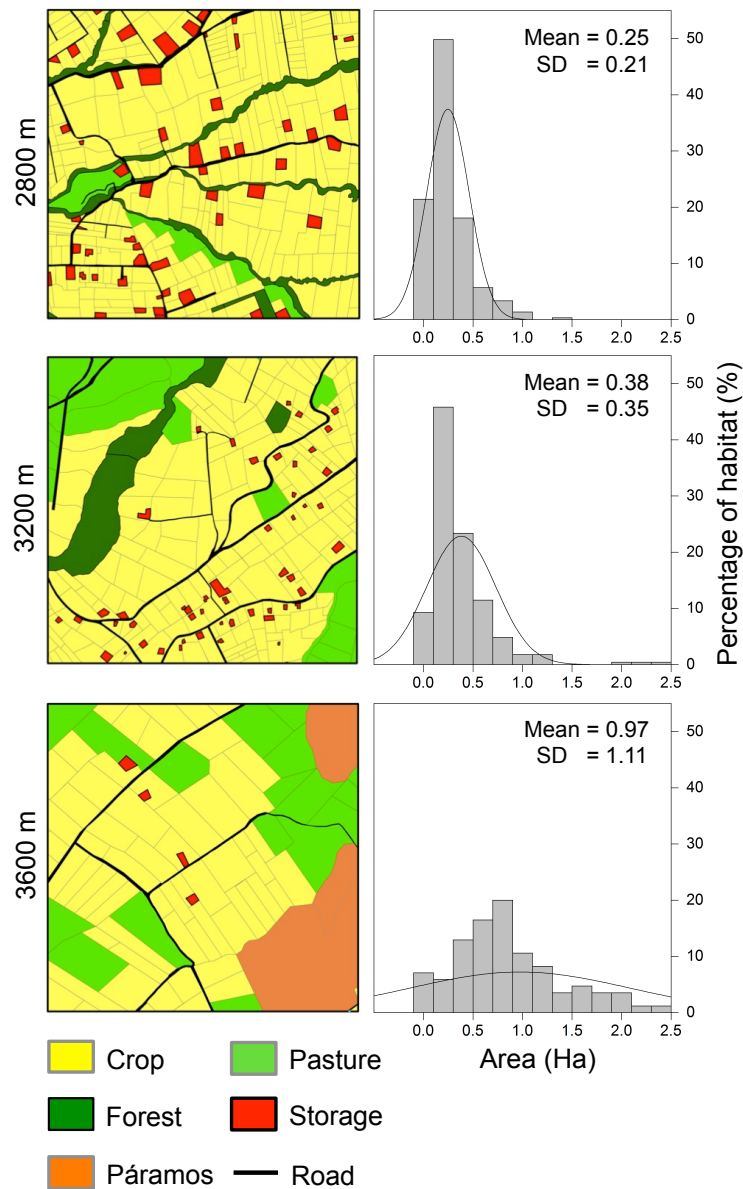

605

606 **Figure S1:** Habitat mapping of the three studied 1-km<sup>2</sup> grid cells at their respective elevations  
607 (2800, 3200 and 3600 m) and the corresponding frequency distribution histograms of field  
608 areas.
